# Supplementary material
Source: publisher figshare collection journal article supplement (https://tandf.figshare.com/articles/dataset/_/6374078)
Supplement: Supplementary file 1 [file 1]

Archive with 13 entries (13 files):
- Compound 1a.pdf
- Compound 1b.pdf
- Compound 2a.pdf
- Compound 2b.pdf
- Compound 3a.pdf
- Compound 3b.pdf
- Compound 5a.pdf
- Compound 5b.pdf
- Compound 7a.pdf
- Compound 7b.pdf
- Compound 8a.pdf
- Compound 8b.pdf
- S .I. Docking methodology.pdf
