# Supplementary material
Source: publisher figshare collection journal article supplement (https://tandf.figshare.com/articles/dataset/_/6374078)

# Compound 1a

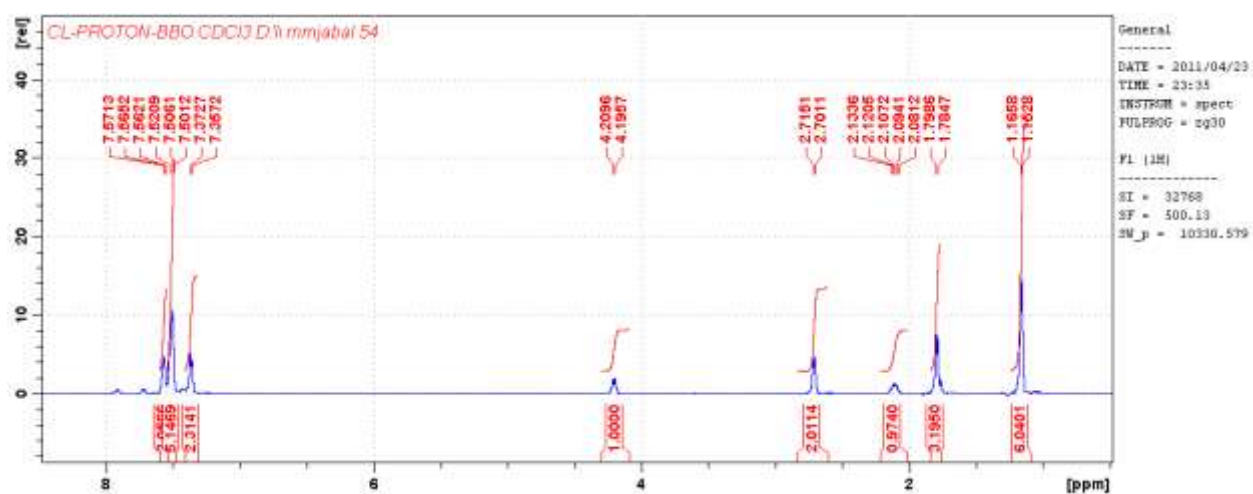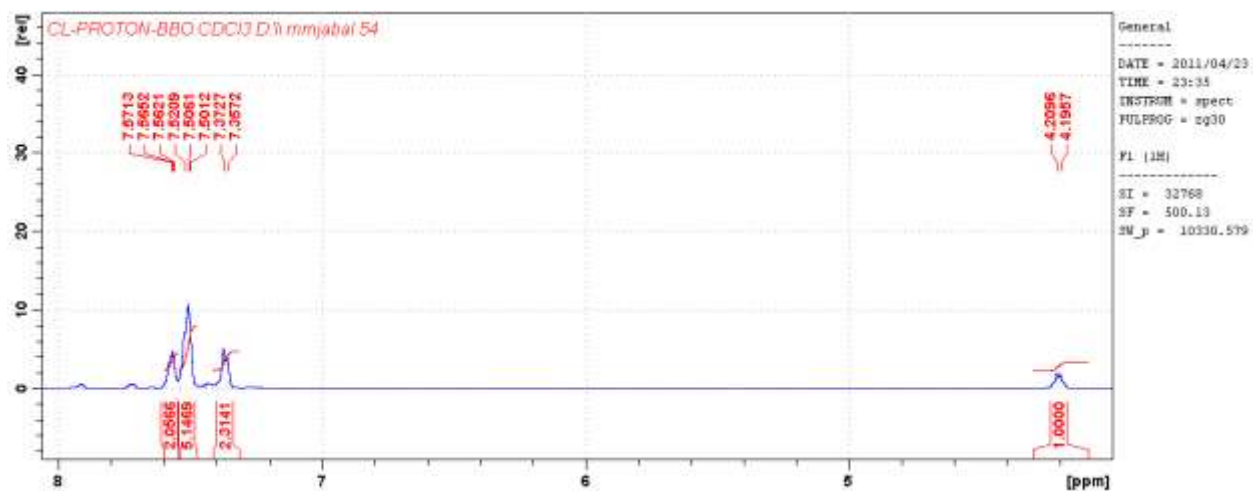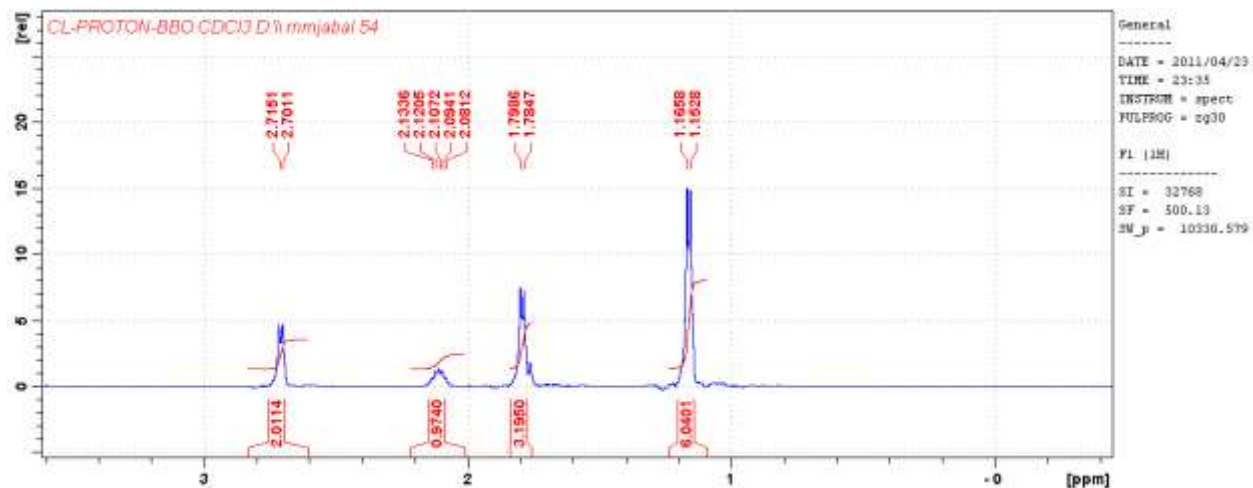

# Compound 1a

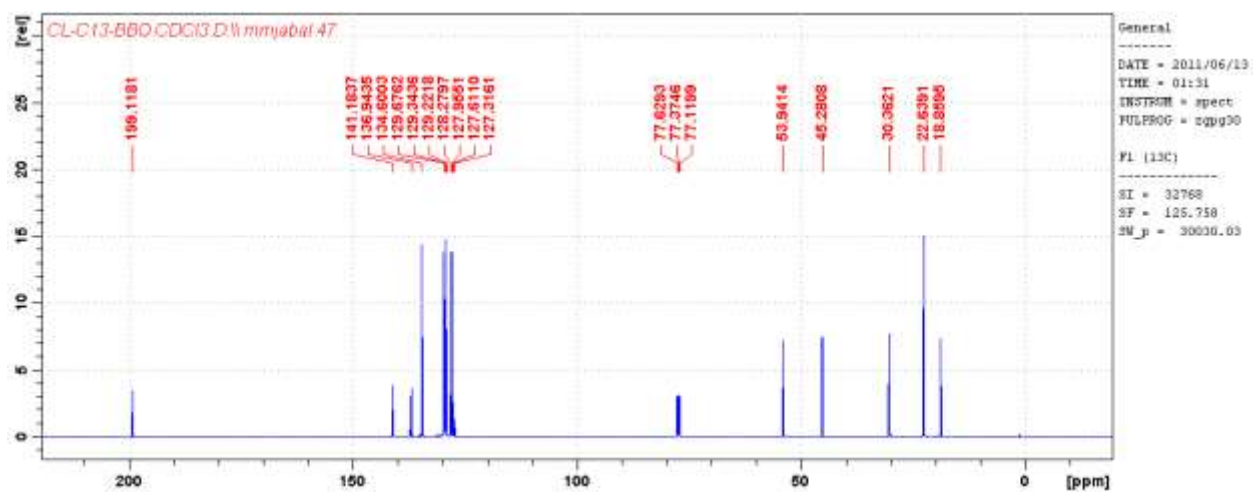

Supplement: Supplementary file 1 [file 1 › Compound 1a.pdf]

# Compound 1b

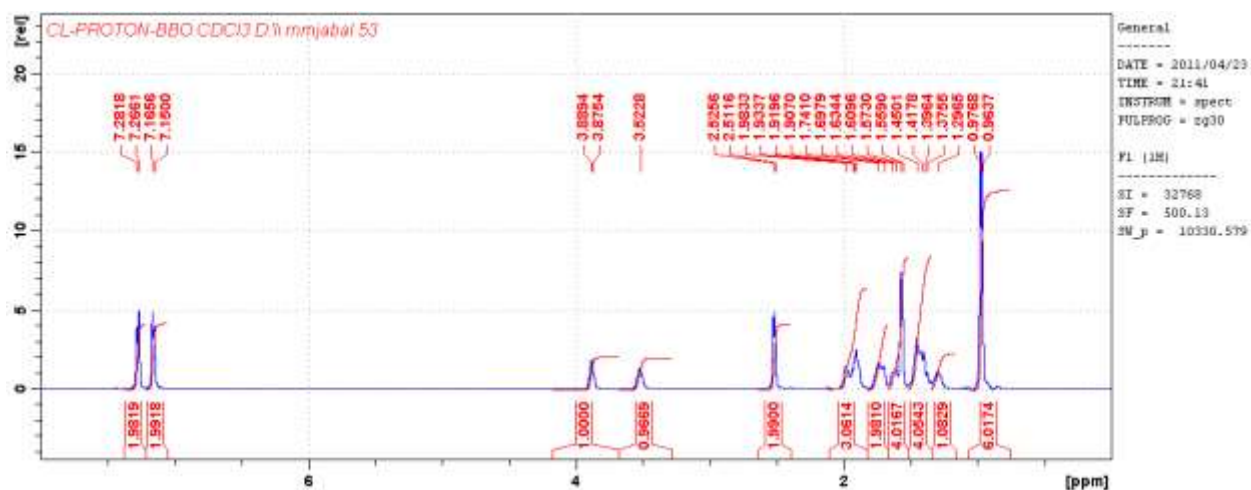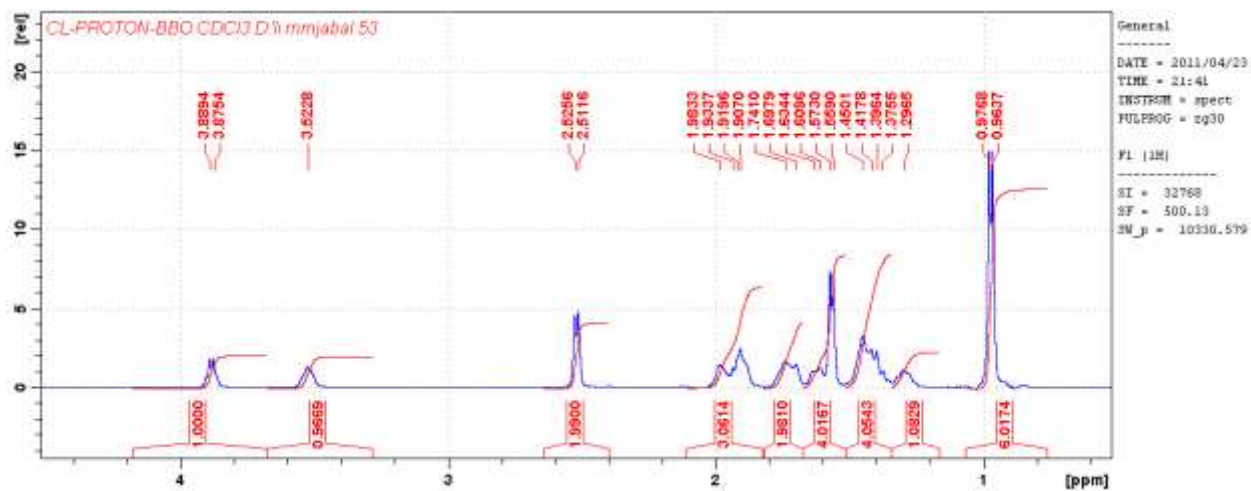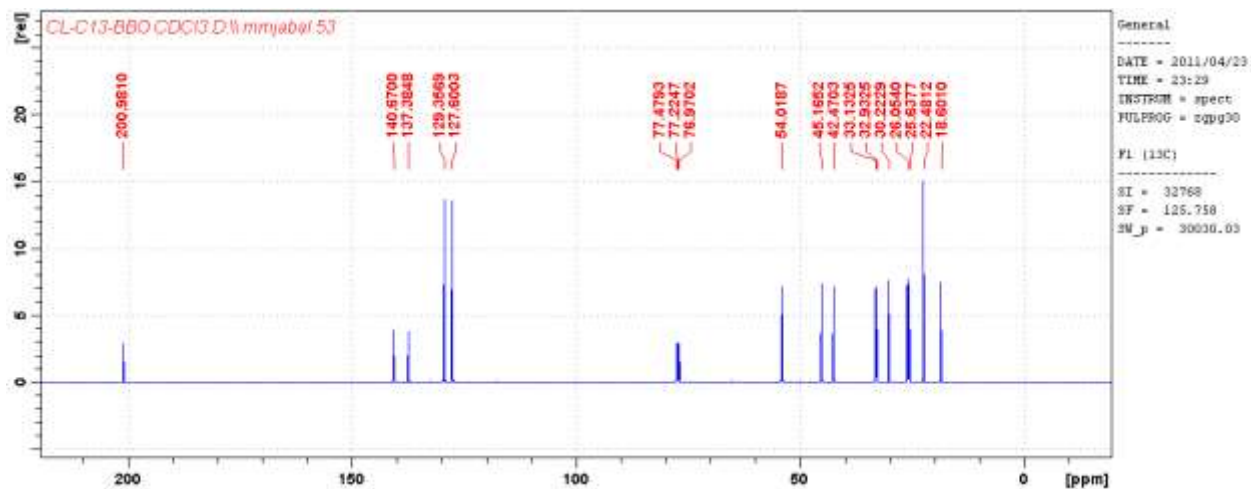

Supplement: Supplementary file 1 [file 1 › Compound 1b.pdf]

# Compound 2a

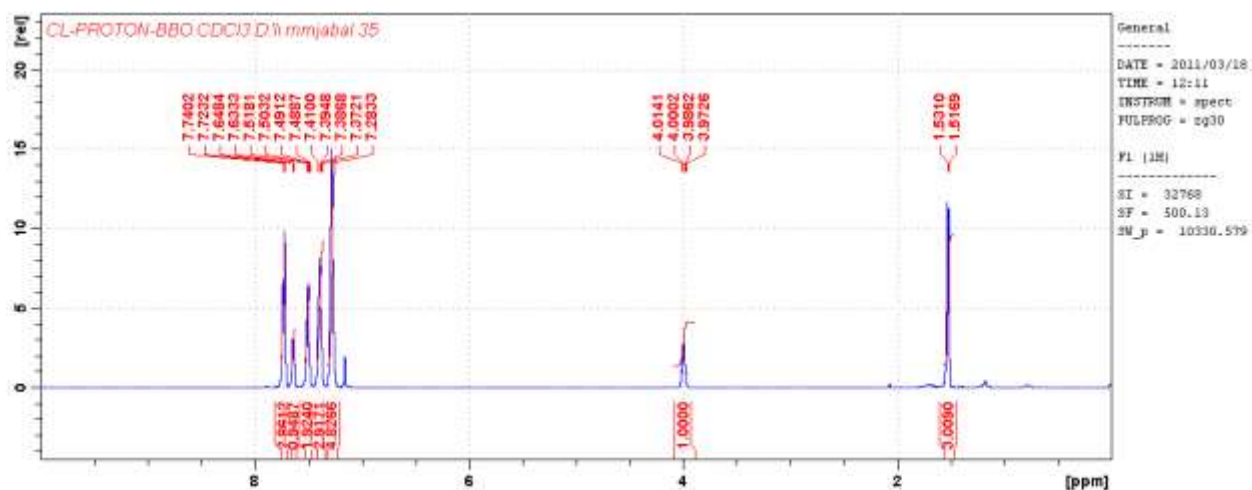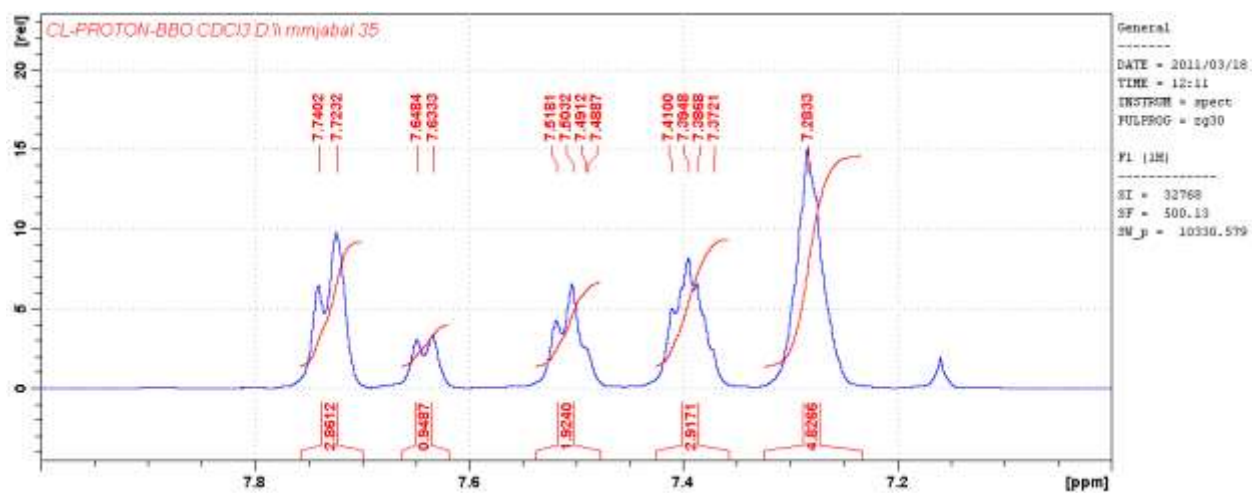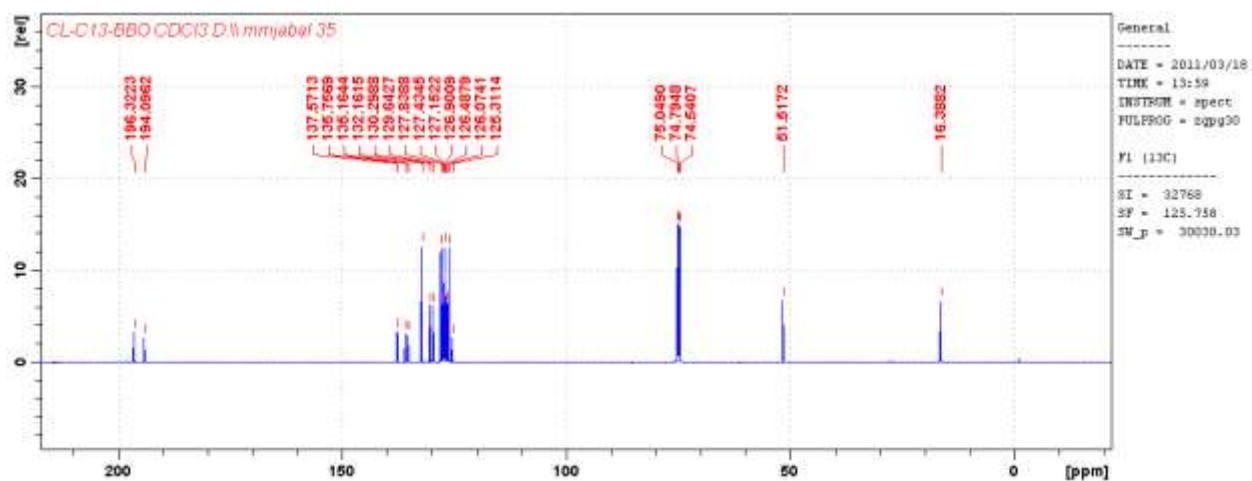

Supplement: Supplementary file 1 [file 1 › Compound 2a.pdf]

# Compound 2b

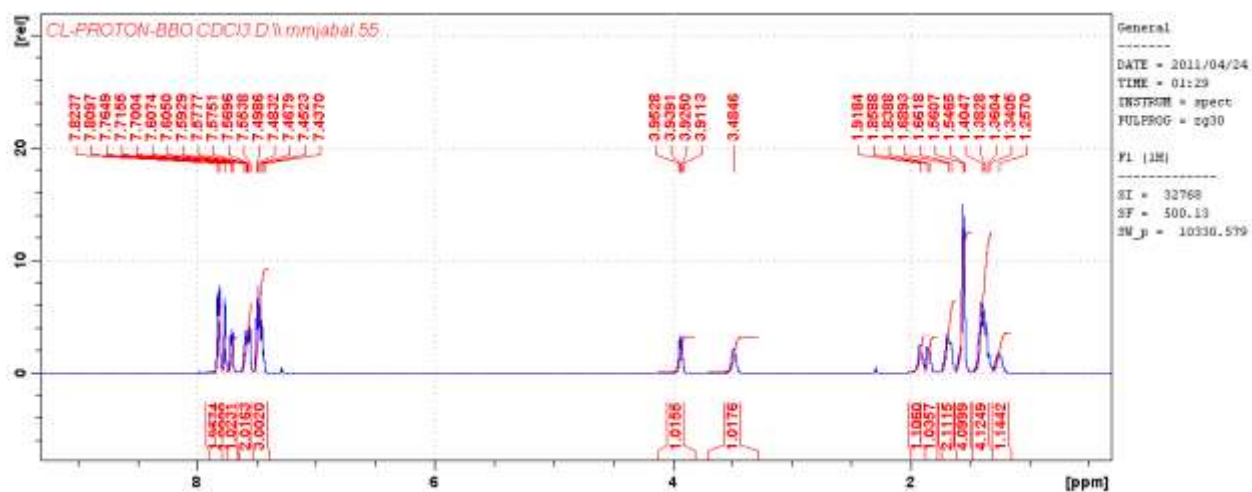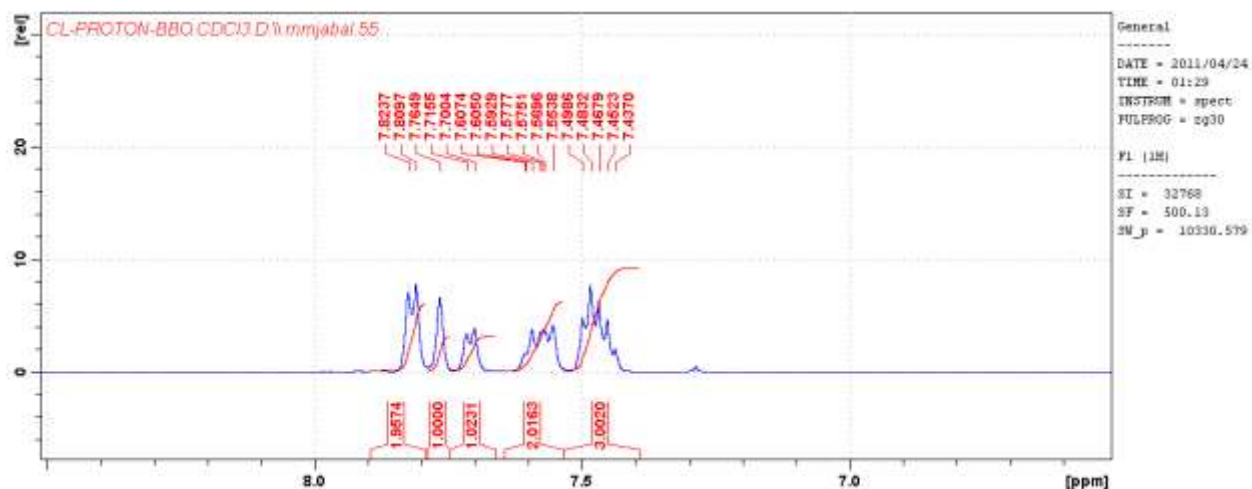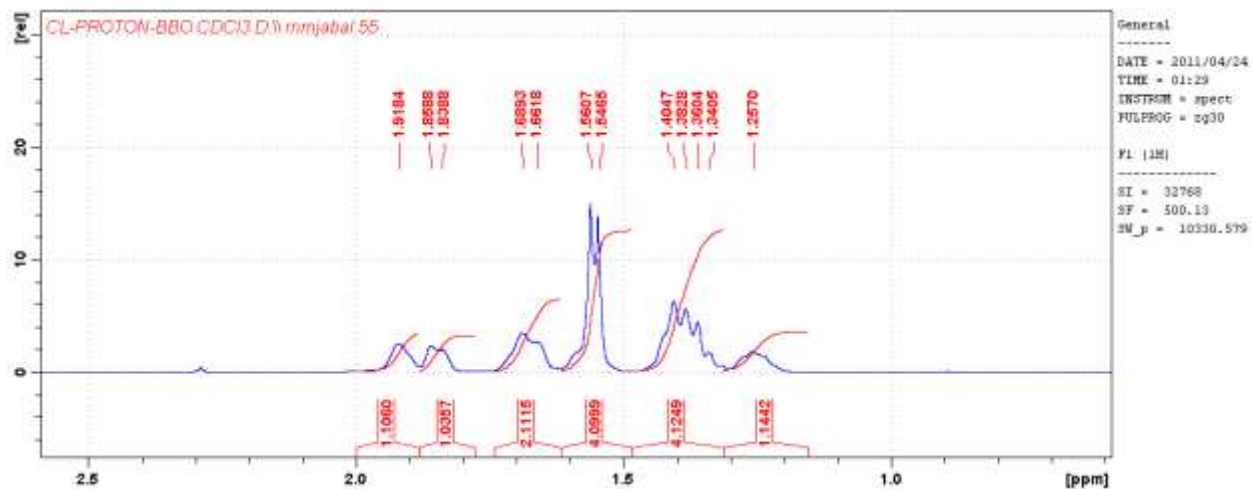

# Compound 2b

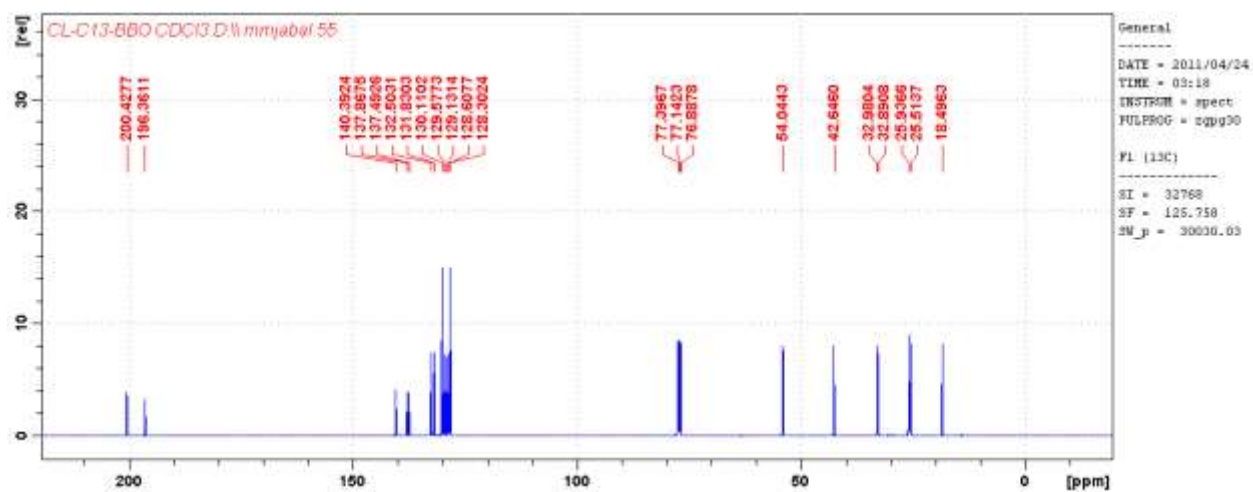

Supplement: Supplementary file 1 [file 1 › Compound 2b.pdf]

# Compound 3a

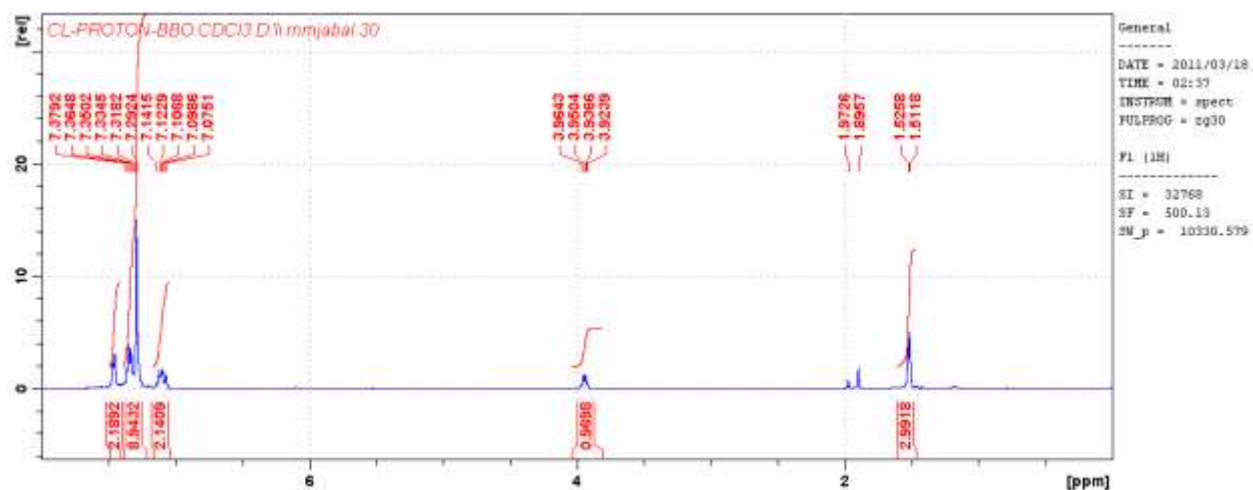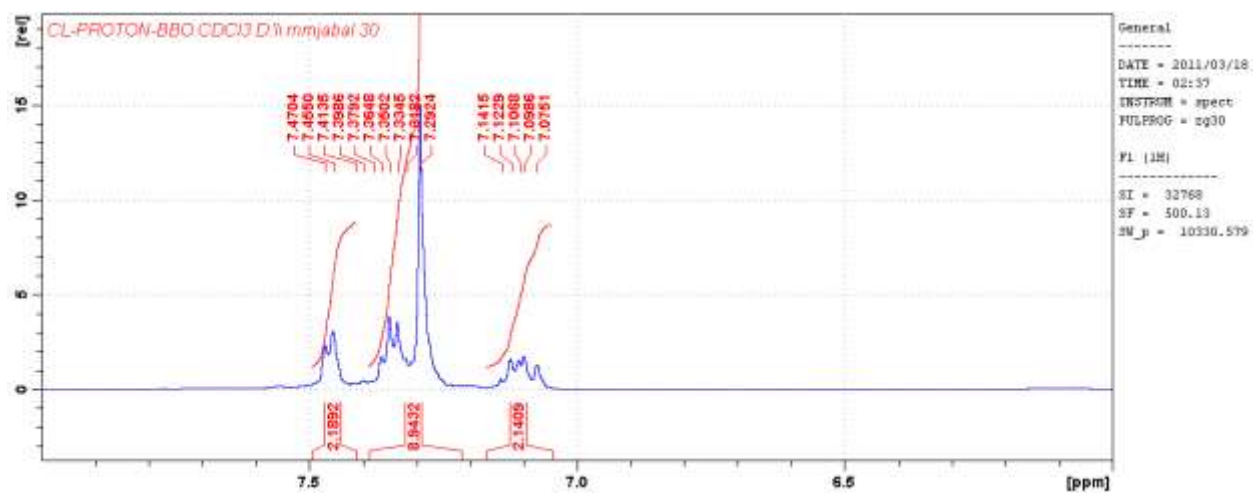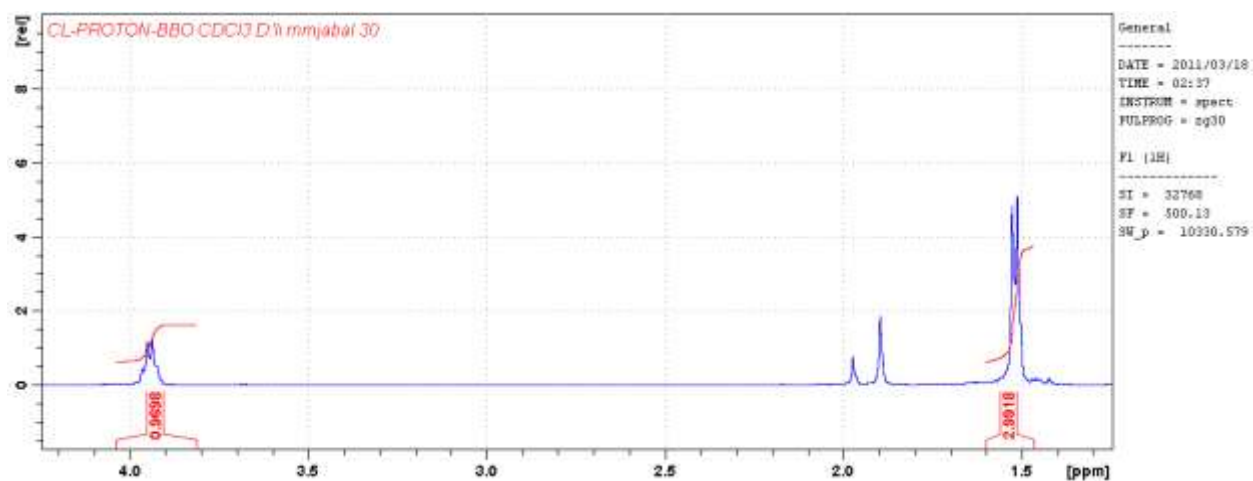

# Compound 3a

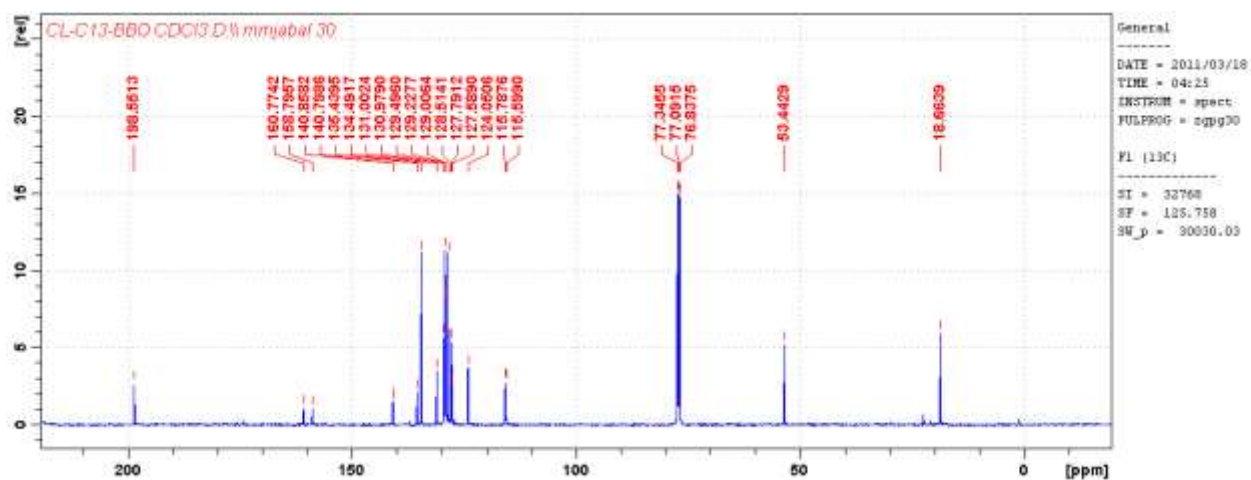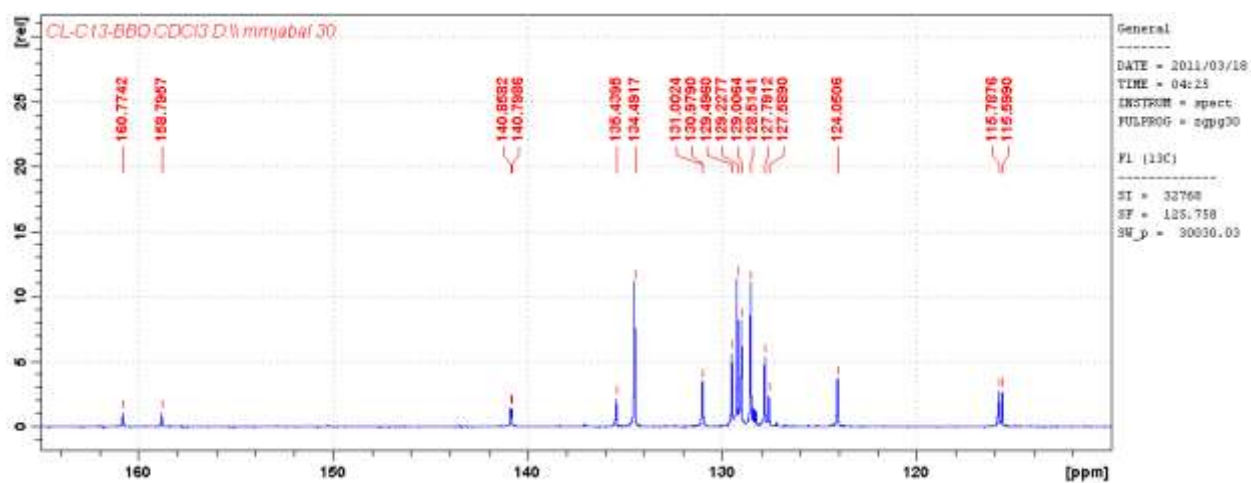

Supplement: Supplementary file 1 [file 1 › Compound 3a.pdf]

# Compound 3b

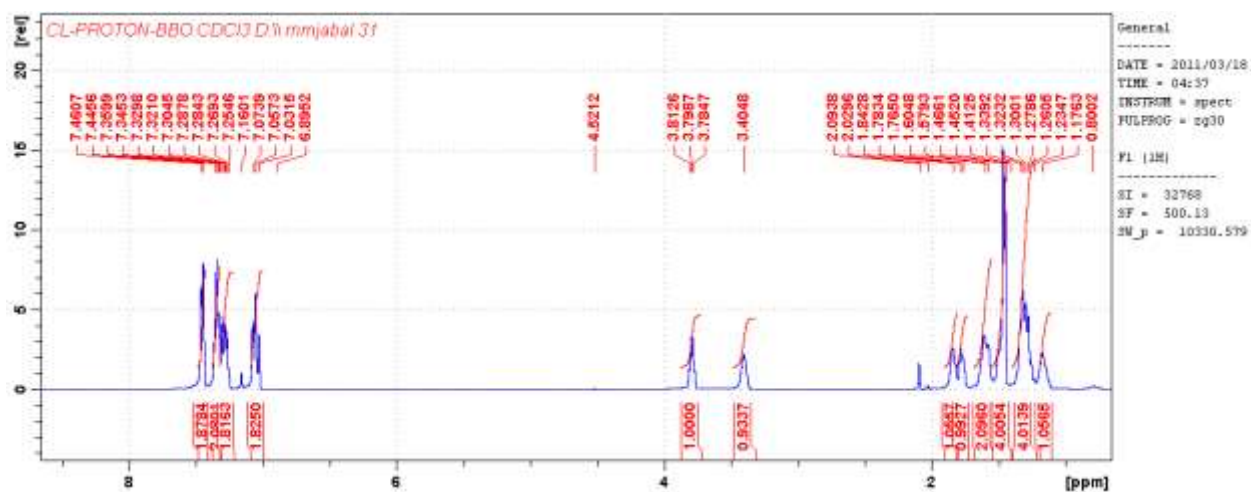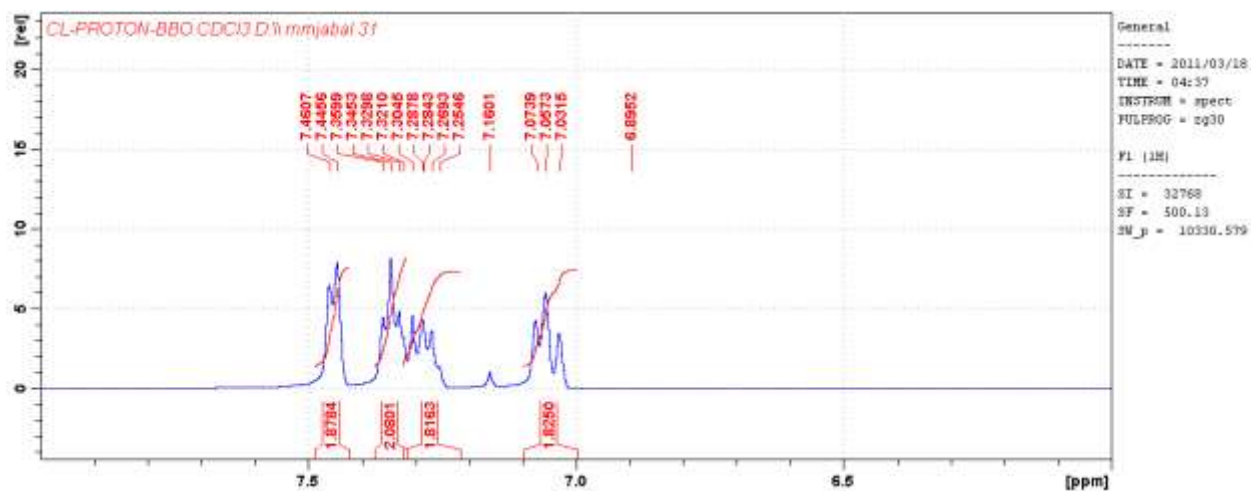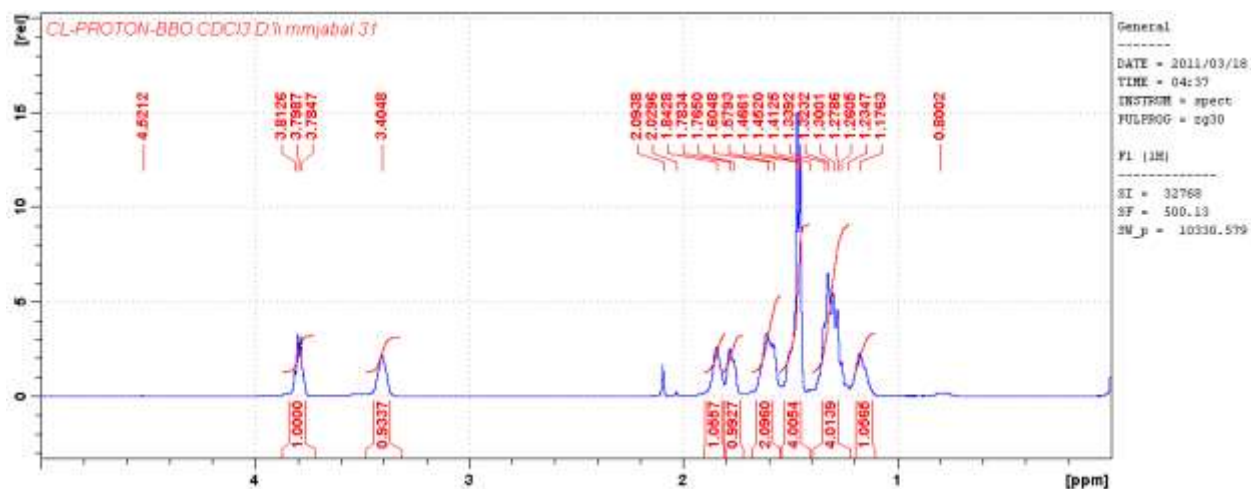

# Compound 3b

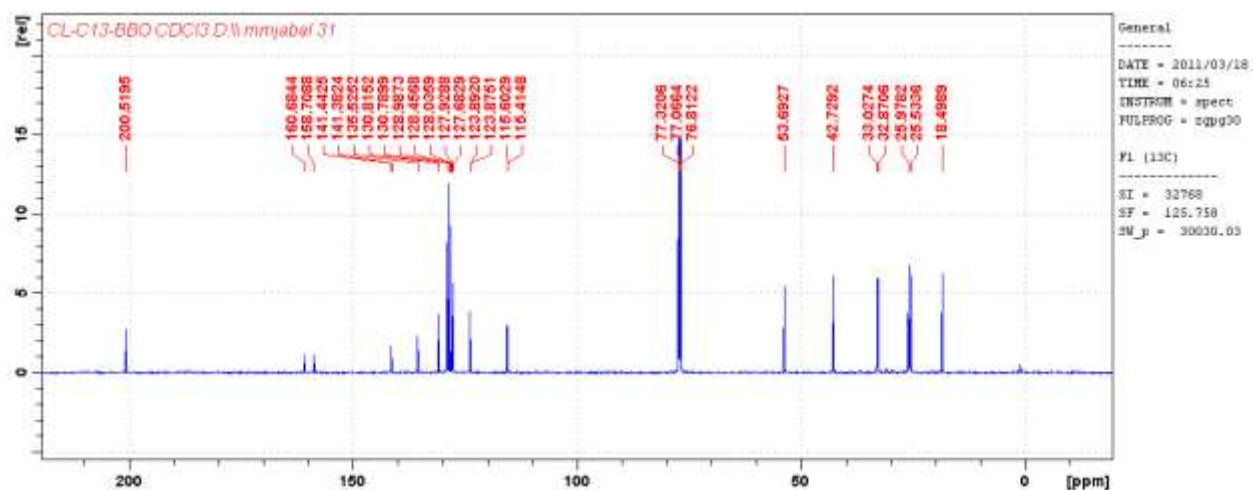

Supplement: Supplementary file 1 [file 1 › Compound 3b.pdf]

# Compound 5a

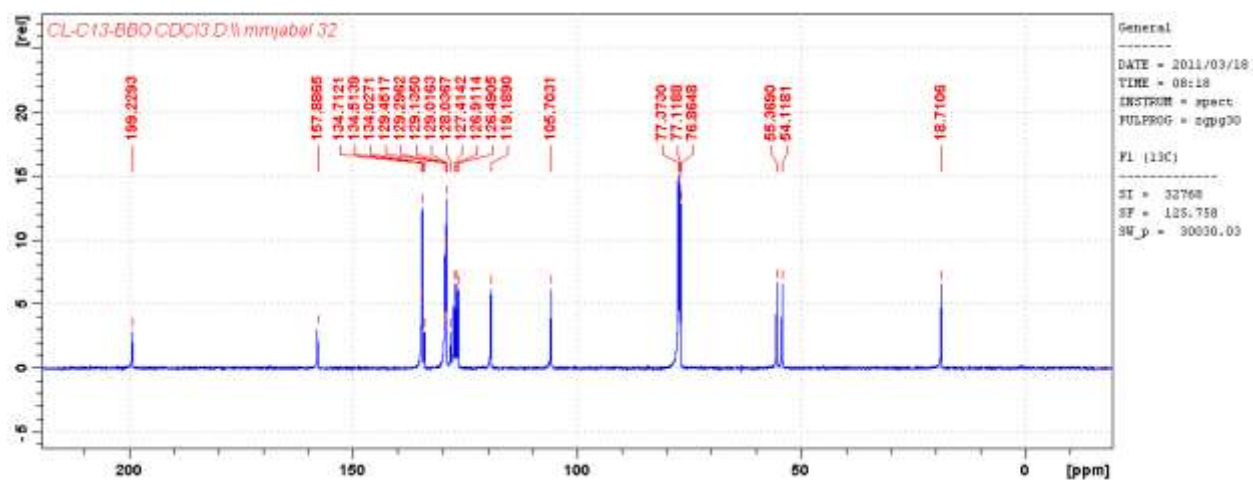

Supplement: Supplementary file 1 [file 1 › Compound 5a.pdf]

# Compound 5b

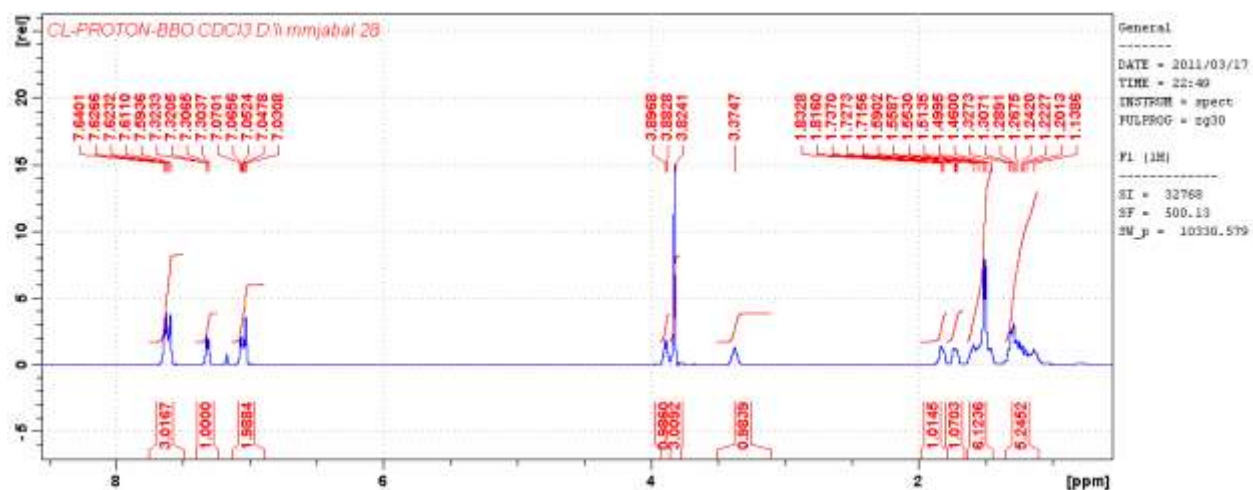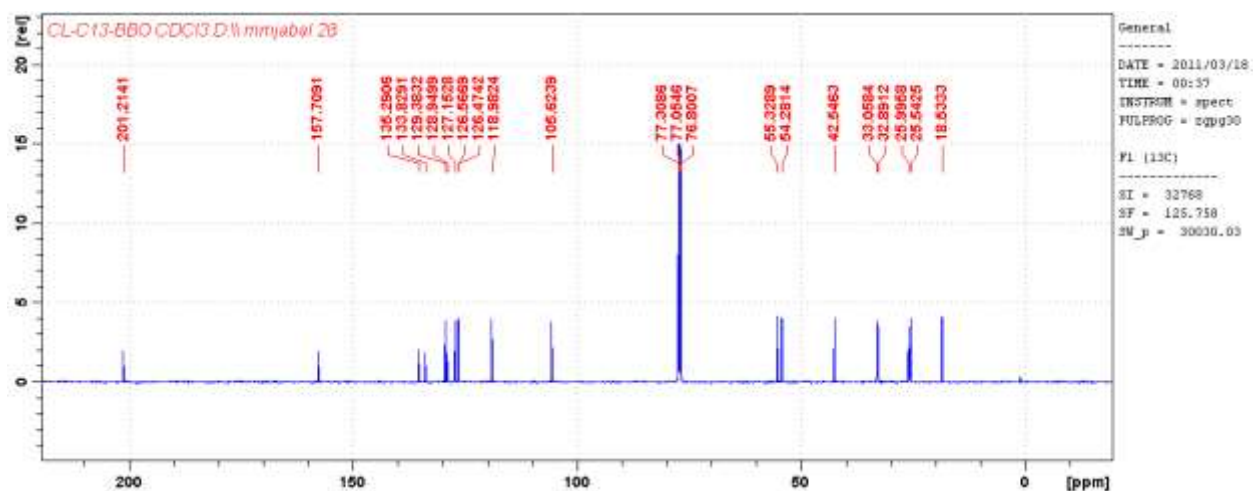

Supplement: Supplementary file 1 [file 1 › Compound 5b.pdf]

# Compound 7a

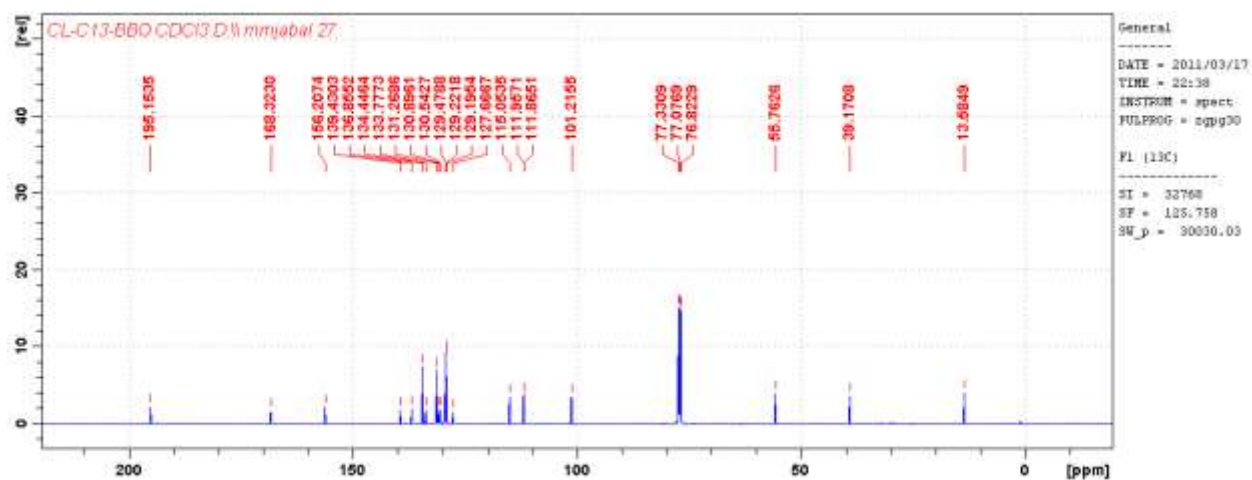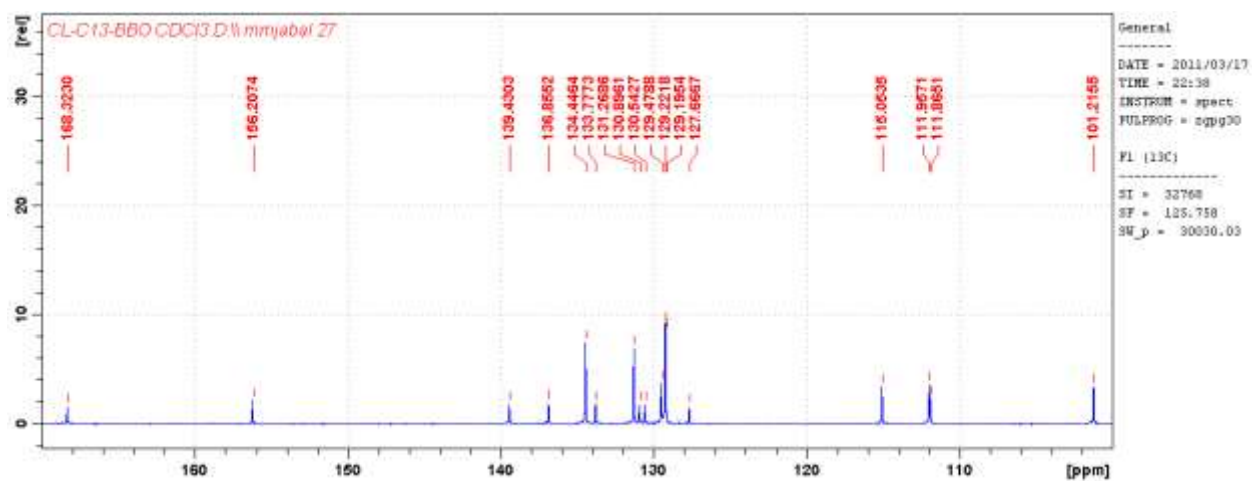

Supplement: Supplementary file 1 [file 1 › Compound 7a.pdf]

# Compound 7b

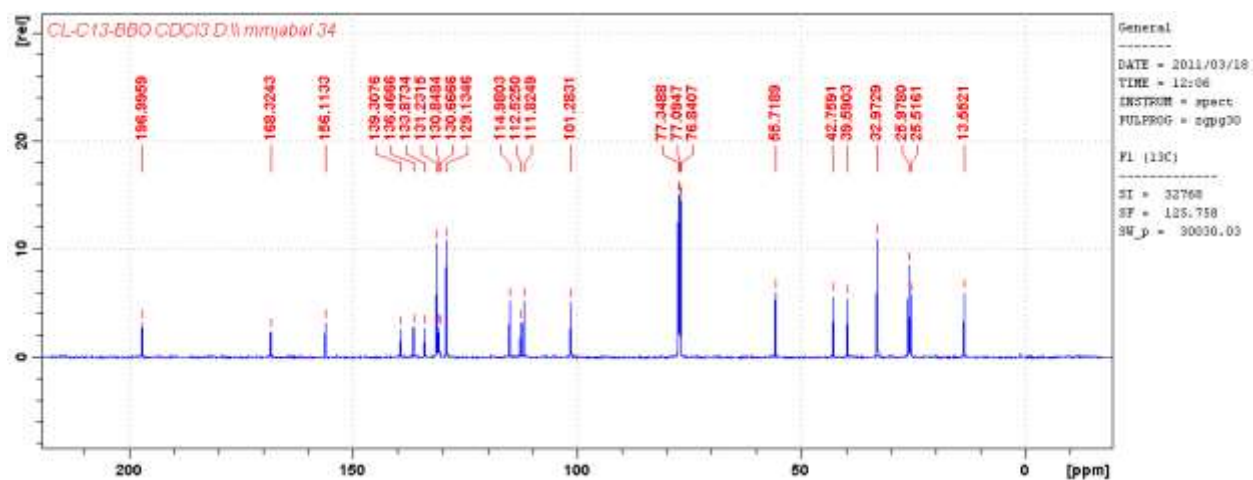

Supplement: Supplementary file 1 [file 1 › Compound 7b.pdf]

# Compound 8a

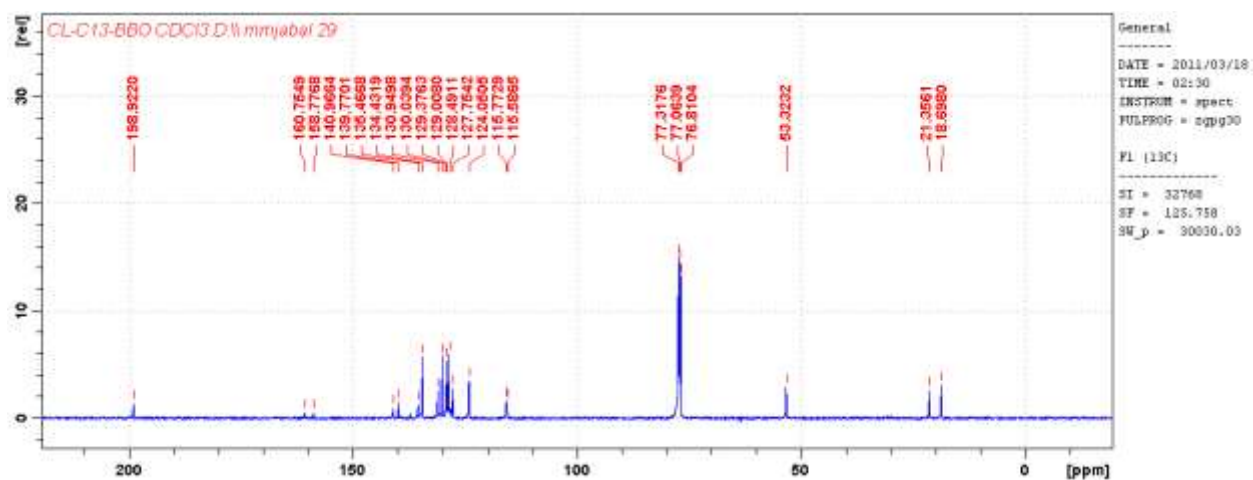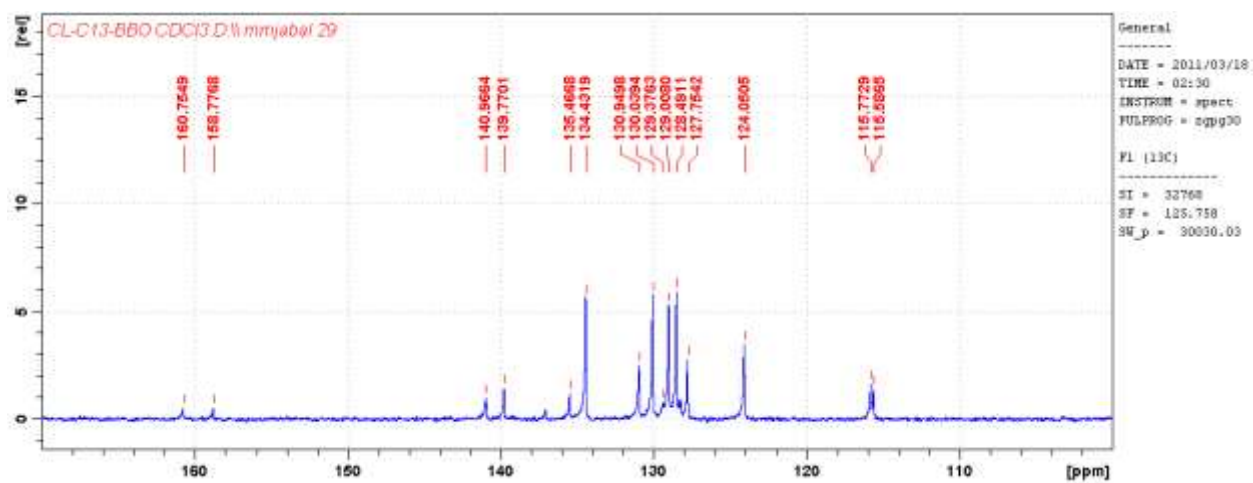

Supplement: Supplementary file 1 [file 1 › Compound 8a.pdf]

# Compound 8b

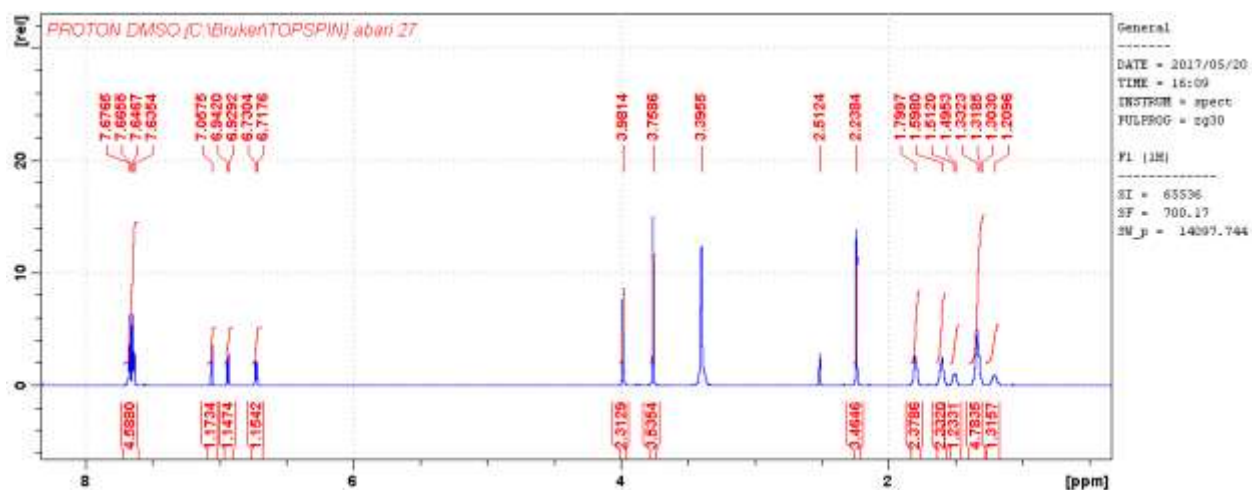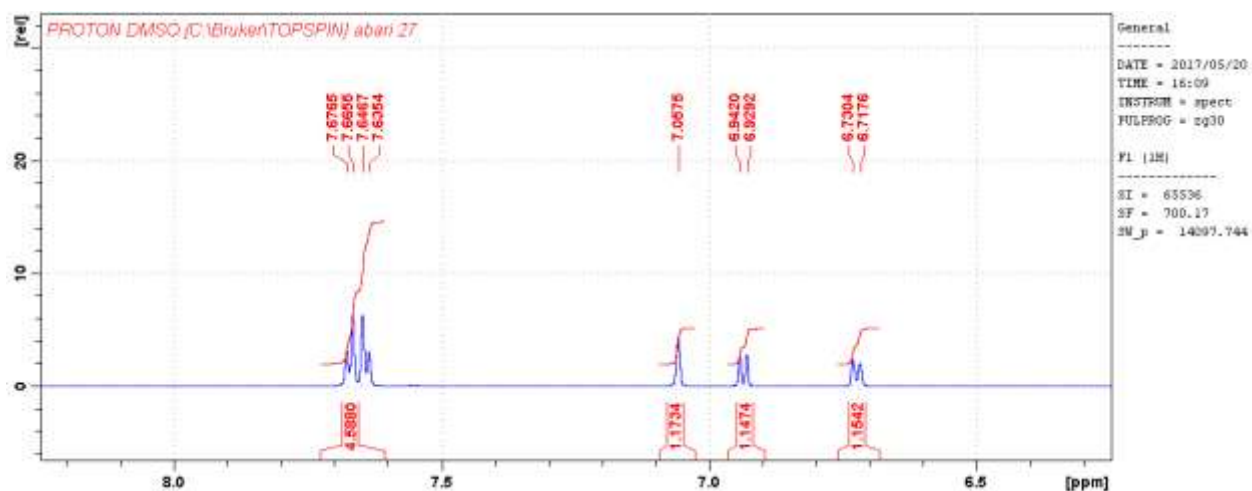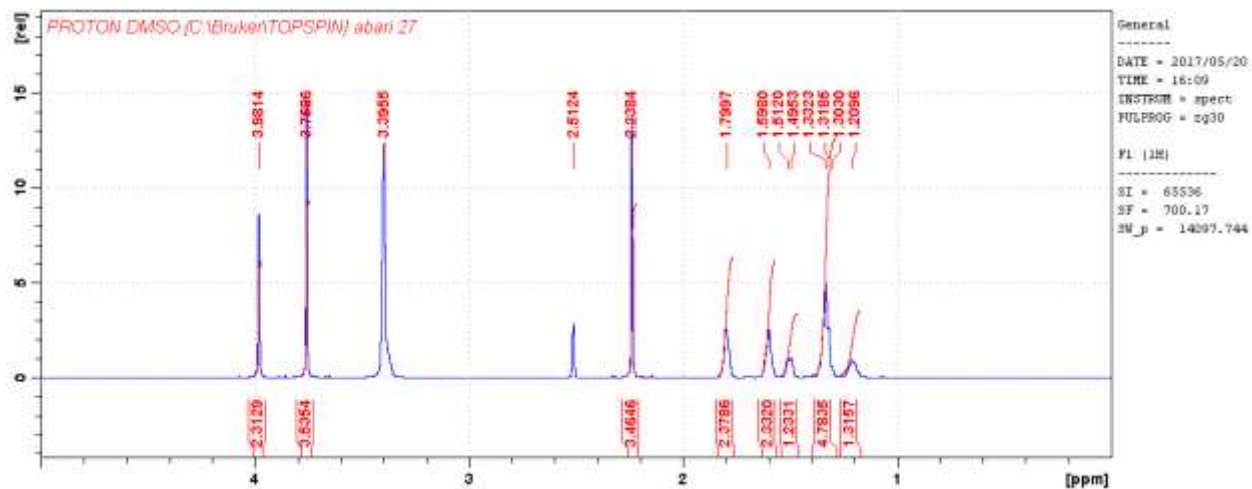

# Compound 8b

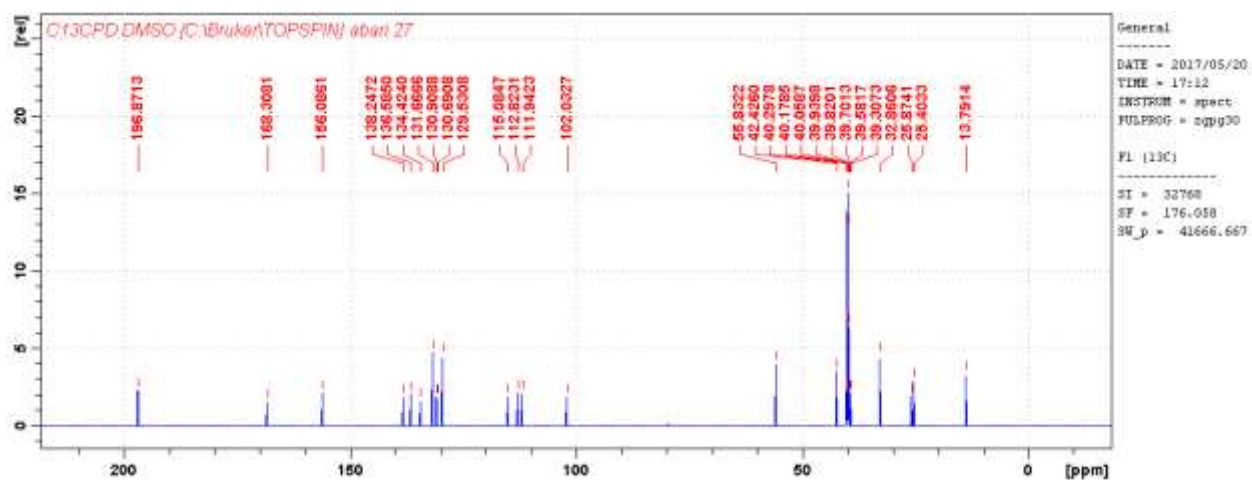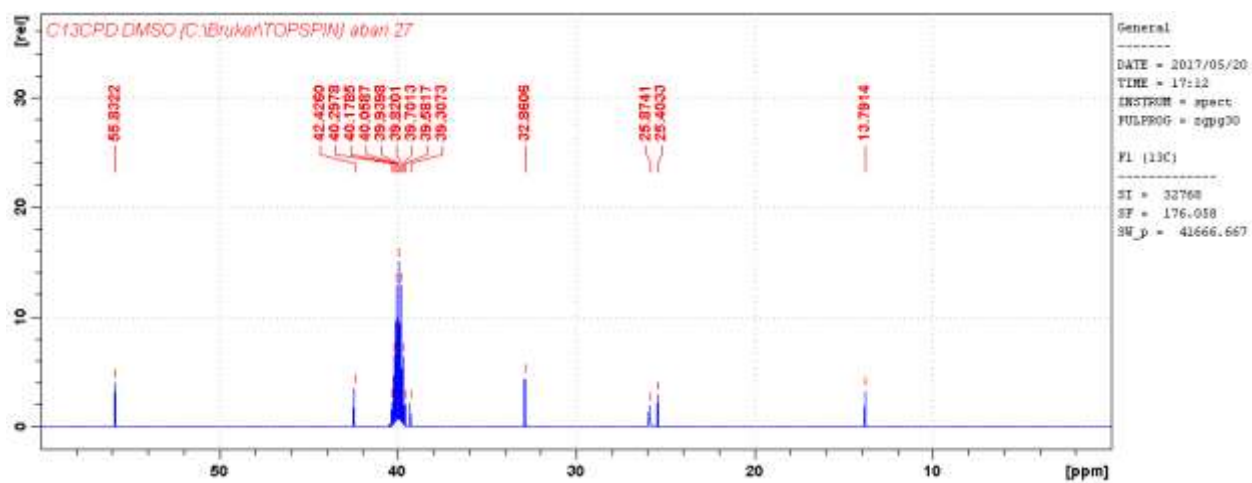

Supplement: Supplementary file 1 [file 1 › Compound 8b.pdf]
